# Supplementary material
Source: publisher figshare collection journal article supplement (https://acs.figshare.com/ndownloader/files/5894469)
Supplement: Supplementary file 1 [file 5894469]

# om980762r.cif

data_maj4 
  
_audit_creation_method            SHELXL 
_chemical_name_systematic 
; 
 ? 
; 
_chemical_name_common             ? 
_chemical_formula_moiety          ? 
_chemical_formula_structural      ? 
_chemical_formula_analytical      ? 
_chemical_formula_sum             'C35 H46 Eu2' 
_chemical_formula_weight          770.64 
_chemical_melting_point           ? 
_chemical_compound_source         ? 
  
loop_ 
 _atom_type_symbol 
 _atom_type_description 
 _atom_type_scat_dispersion_real 
 _atom_type_scat_dispersion_imag 
 _atom_type_scat_source 
 'C'  'C'   0.0033   0.0016 
 'International Tables Vol C Tables 4.2.6.8 and 6.1.1.4' 
 'H'  'H'   0.0000   0.0000 
 'International Tables Vol C Tables 4.2.6.8 and 6.1.1.4' 
 'Eu'  'Eu'  -0.1578   3.6682 
 'International Tables Vol C Tables 4.2.6.8 and 6.1.1.4' 
  
_symmetry_cell_setting            Orthorhombic 
_symmetry_space_group_name_H-M    P2(1)2(1)2(1) 
  
loop_ 
 _symmetry_equiv_pos_as_xyz 
 'x, y, z' 
 '-x+1/2, -y, z+1/2' 
 '-x, y+1/2, -z+1/2' 
 'x+1/2, -y+1/2, -z' 
  
_cell_length_a                    11.856(6) 
_cell_length_b                    15.220(6) 
_cell_length_c                    17.399(6) 
_cell_angle_alpha                 90.00 
_cell_angle_beta                  90.00 
_cell_angle_gamma                 90.00 
_cell_volume                      3139.9(23) 
_cell_formula_units_Z             4 
_cell_measurement_temperature     153 
_cell_measurement_reflns_used     21 
_cell_measurement_theta_min       5.80 
_cell_measurement_theta_max       15.65 
  
_exptl_crystal_description        irregular 
_exptl_crystal_colour             orange 
_exptl_crystal_size_max           0.23 
_exptl_crystal_size_mid           0.16 
_exptl_crystal_size_min           0.1 
_exptl_crystal_density_meas       ? 
_exptl_crystal_density_diffrn     1.630 
_exptl_crystal_density_method     ? 
_exptl_crystal_F_000              1528 
_exptl_absorpt_coefficient_mu     3.979 
_exptl_absorpt_correction_type    empirical 
_exptl_absorpt_correction_T_min   0.0648 
_exptl_absorpt_correction_T_max   0.1022 
  
_exptl_special_details 
; 
 ? 
; 
  
_diffrn_ambient_temperature       153 
_diffrn_radiation_wavelength      0.71073 
_diffrn_radiation_type            MoK\a 
_diffrn_radiation_source          'fine-focus sealed tube' 
_diffrn_radiation_monochromator   graphite 
_diffrn_measurement_device        'Siemens P4' 
_diffrn_measurement_method        '2\q/\w scans' 
_diffrn_standards_number          1 
_diffrn_standards_interval_count  99 
_diffrn_standards_interval_time   ? 
_diffrn_standards_decay_%         <1% 
_diffrn_reflns_number             3456 
_diffrn_reflns_av_R_equivalents   0.0000 
_diffrn_reflns_av_sigmaI/netI     0.0545 
_diffrn_reflns_limit_h_min        0 
_diffrn_reflns_limit_h_max        14 
_diffrn_reflns_limit_k_min        0 
_diffrn_reflns_limit_k_max        18 
_diffrn_reflns_limit_l_min        0 
_diffrn_reflns_limit_l_max        21 
_diffrn_reflns_theta_min          2.08 
_diffrn_reflns_theta_max          26.00 
_reflns_number_total              3456 
_reflns_number_observed           2762 
_reflns_observed_criterion        >2sigma(I) 
  
_computing_data_collection        'Siemens XSCANS' 
_computing_cell_refinement        'Siemens XSCANS' 
_computing_data_reduction         'Siemens SHELXTL' 
_computing_structure_solution     'SHELXS-86 (Sheldrick, 1990)' 
_computing_structure_refinement   'SHELXL-93 (Sheldrick, 1993)' 
_computing_molecular_graphics     'Siemens SHELXTL' 
_computing_publication_material   'Siemens SHELXTL' 
  
_refine_special_details 
; 
 Refinement on F^2^ for ALL reflections except for 1 with very negative F^2^ 
 or flagged by the user for potential systematic errors.  Weighted R-factors 
 wR and all goodnesses of fit S are based on F^2^, conventional R-factors R 
 are based on F, with F set to zero for negative F^2^. The observed criterion 
 of F^2^ > 2sigma(F^2^) is used only for calculating _R_factor_obs etc. and is 
 not relevant to the choice of reflections for refinement.  R-factors based 
 on F^2^ are statistically about twice as large as those based on F, and R- 
 factors based on ALL data will be even larger. 
; 
  
_refine_ls_structure_factor_coef  Fsqd 
_refine_ls_matrix_type            full 
_refine_ls_weighting_scheme 
 'calc w=1/[\s^2^(Fo^2^)+(0.0653P)^2^+33.5493P] where P=(Fo^2^+2Fc^2^)/3' 
_atom_sites_solution_primary      direct 
_atom_sites_solution_secondary    difmap 
_atom_sites_solution_hydrogens    geom 
_refine_ls_hydrogen_treatment     ? 
_refine_ls_extinction_method      none 
_refine_ls_extinction_coef        ? 
_refine_ls_abs_structure_details 
 'Flack H D (1983), Acta Cryst. A39, 876-881' 
_refine_ls_abs_structure_Flack    0.46(8) 
_refine_ls_number_reflns          3455 
_refine_ls_number_parameters      347 
_refine_ls_number_restraints      0 
_refine_ls_R_factor_all           0.0760 
_refine_ls_R_factor_obs           0.0526 
_refine_ls_wR_factor_all          0.1665 
_refine_ls_wR_factor_obs          0.1519 
_refine_ls_goodness_of_fit_all    1.255 
_refine_ls_goodness_of_fit_obs    1.315 
_refine_ls_restrained_S_all       1.274 
_refine_ls_restrained_S_obs       1.315 
_refine_ls_shift/esd_max          1.310 
_refine_ls_shift/esd_mean         0.009 
  
loop_ 
 _atom_site_label 
 _atom_site_type_symbol 
 _atom_site_fract_x 
 _atom_site_fract_y 
 _atom_site_fract_z 
 _atom_site_U_iso_or_equiv 
 _atom_site_thermal_displace_type 
 _atom_site_occupancy 
 _atom_site_calc_flag 
 _atom_site_refinement_flags 
 _atom_site_disorder_group 
Eu1 Eu 0.14698(8) -1.38124(7) -0.80189(5) 0.0299(3) Uani 1 d . . 
Eu2 Eu 0.17821(7) -1.36874(7) -0.55630(5) 0.0250(2) Uani 1 d . . 
C1 C -0.0234(19) -1.4308(15) -0.9049(14) 0.035(5) Uani 1 d . . 
C2 C -0.0553(20) -1.3494(14) -0.8779(11) 0.032(5) Uani 1 d . . 
C3 C 0.0230(21) -1.2861(14) -0.9049(14) 0.038(6) Uani 1 d . . 
C4 C 0.1025(20) -1.3302(14) -0.9508(12) 0.034(5) Uani 1 d . . 
C5 C 0.0750(17) -1.4204(13) -0.9521(13) 0.026(4) Uani 1 d . . 
C6 C -0.0835(22) -1.5179(18) -0.8927(16) 0.054(7) Uani 1 d . . 
H6A H -0.0424(22) -1.5639(18) -0.9180(16) 0.081 Uiso 1 calc R . 
H6B H -0.1583(22) -1.5146(18) -0.9136(16) 0.081 Uiso 1 calc R . 
H6C H -0.0878(22) -1.5303(18) -0.8386(16) 0.081 Uiso 1 calc R . 
C7 C -0.1599(25) -1.3303(20) -0.8289(14) 0.063(8) Uani 1 d . . 
H7A H -0.1633(25) -1.2687(20) -0.8176(14) 0.094 Uiso 1 calc R . 
H7B H -0.1555(25) -1.3630(20) -0.7818(14) 0.094 Uiso 1 calc R . 
H7C H -0.2264(25) -1.3474(20) -0.8567(14) 0.094 Uiso 1 calc R . 
C8 C 0.0232(30) -1.1845(17) -0.8917(19) 0.073(10) Uani 1 d . . 
H8A H -0.0383(30) -1.1688(17) -0.8586(19) 0.109 Uiso 1 calc R . 
H8B H 0.0149(30) -1.1550(17) -0.9402(19) 0.109 Uiso 1 calc R . 
H8C H 0.0931(30) -1.1673(17) -0.8683(19) 0.109 Uiso 1 calc R . 
C9 C 0.2005(25) -1.2870(18) -0.9945(14) 0.056(7) Uani 1 d . . 
H9A H 0.2424(25) -1.3313(18) -1.0215(14) 0.085 Uiso 1 calc R . 
H9B H 0.2492(25) -1.2576(18) -0.9587(14) 0.085 Uiso 1 calc R . 
H9C H 0.1712(25) -1.2452(18) -1.0306(14) 0.085 Uiso 1 calc R . 
C10 C 0.1257(22) -1.4907(15) -1.0012(15) 0.048(7) Uani 1 d . . 
H10A H 0.0905(22) -1.5459(15) -0.9897(15) 0.071 Uiso 1 calc R . 
H10B H 0.2051(22) -1.4946(15) -0.9911(15) 0.071 Uiso 1 calc R . 
H10C H 0.1139(22) -1.4766(15) -1.0544(15) 0.071 Uiso 1 calc R . 
C11 C -0.0007(18) -1.4067(13) -0.4555(10) 0.027(4) Uani 1 d . . 
C12 C 0.0043(20) -1.3143(13) -0.4583(11) 0.028(5) Uani 1 d . . 
C13 C 0.1046(19) -1.2855(13) -0.4211(11) 0.025(4) Uani 1 d . . 
C14 C 0.1616(17) -1.3643(13) -0.3961(10) 0.029(4) Uani 1 d . . 
C15 C 0.0983(20) -1.4395(14) -0.4170(11) 0.027(5) Uani 1 d . . 
C16 C -0.0993(17) -1.4628(15) -0.4858(13) 0.034(5) Uani 1 d . . 
H16A H -0.0831(17) -1.5238(15) -0.4775(13) 0.051 Uiso 1 calc R . 
H16B H -0.1088(17) -1.4523(15) -0.5399(13) 0.051 Uiso 1 calc R . 
H16C H -0.1672(17) -1.4471(15) -0.4591(13) 0.051 Uiso 1 calc R . 
C17 C -0.0834(23) -1.2539(17) -0.4907(14) 0.041(6) Uani 1 d . . 
H17A H -0.0587(23) -1.1942(17) -0.4853(14) 0.062 Uiso 1 calc R . 
H17B H -0.1530(23) -1.2619(17) -0.4634(14) 0.062 Uiso 1 calc R . 
H17C H -0.0946(23) -1.2670(17) -0.5441(14) 0.062 Uiso 1 calc R . 
C18 C 0.1409(23) -1.1930(15) -0.4045(14) 0.046(6) Uani 1 d . . 
H18A H 0.2124(23) -1.1936(15) -0.3788(14) 0.069 Uiso 1 calc R . 
H18B H 0.0858(23) -1.1650(15) -0.3724(14) 0.069 Uiso 1 calc R . 
H18C H 0.1476(23) -1.1611(15) -0.4520(14) 0.069 Uiso 1 calc R . 
C19 C 0.2672(19) -1.3657(16) -0.3442(11) 0.039(5) Uani 1 d . . 
H19A H 0.2954(19) -1.3070(16) -0.3382(11) 0.058 Uiso 1 calc R . 
H19B H 0.3242(19) -1.4018(16) -0.3673(11) 0.058 Uiso 1 calc R . 
H19C H 0.2476(19) -1.3891(16) -0.2947(11) 0.058 Uiso 1 calc R . 
C20 C 0.1200(18) -1.5333(15) -0.3958(12) 0.033(5) Uani 1 d . . 
H20A H 0.0630(18) -1.5700(15) -0.4183(12) 0.050 Uiso 1 calc R . 
H20B H 0.1182(18) -1.5394(15) -0.3409(12) 0.050 Uiso 1 calc R . 
H20C H 0.1928(18) -1.5507(15) -0.4147(12) 0.050 Uiso 1 calc R . 
C21 C 0.0692(22) -1.2818(16) -0.6774(14) 0.036(6) Uani 1 d . . 
H21A H 0.0196(22) -1.2345(16) -0.6768(14) 0.043 Uiso 1 calc R . 
C22 C 0.1828(20) -1.2543(13) -0.6842(13) 0.034(5) Uani 1 d . . 
H22A H 0.1904(20) -1.1935(13) -0.6826(13) 0.041 Uiso 1 calc R . 
C23 C 0.2871(22) -1.2979(14) -0.6930(13) 0.037(6) Uani 1 d . . 
H23A H 0.3468(22) -1.2599(14) -0.7030(13) 0.045 Uiso 1 calc R . 
C24 C 0.3205(16) -1.3887(14) -0.6896(9) 0.032(5) Uani 1 d . . 
H24A H 0.3984(16) -1.3949(14) -0.6926(9) 0.038 Uiso 1 calc R . 
C25 C 0.2667(20) -1.4703(14) -0.6829(13) 0.031(5) Uani 1 d . . 
H25A H 0.3159(20) -1.5178(14) -0.6850(13) 0.037 Uiso 1 calc R . 
C26 C 0.1540(20) -1.4947(13) -0.6738(12) 0.034(5) Uani 1 d . . 
H26A H 0.1458(20) -1.5550(13) -0.6677(12) 0.041 Uiso 1 calc R . 
C27 C 0.0490(20) -1.4504(15) -0.6716(13) 0.031(5) Uani 1 d . . 
H27A H -0.0112(20) -1.4896(15) -0.6698(13) 0.038 Uiso 1 calc R . 
C28 C 0.0122(19) -1.3628(17) -0.6713(11) 0.039(5) Uani 1 d . . 
H28A H -0.0655(19) -1.3570(17) -0.6661(11) 0.047 Uiso 1 calc R . 
C29 C -0.0328(17) -1.3456(14) -1.1814(10) 0.036(5) Uani 1 d G . 
C30 C -0.0907(18) -1.3654(18) -1.1141(10) 0.043(6) Uani 1 d G . 
H30A H -0.0761(116) -1.3317(138) -1.0707(17) 0.051 Uiso 1 calc R . 
C31 C -0.1667(26) -1.4306(18) -1.1083(17) 0.061(8) Uani 1 d G . 
H31A H -0.2021(26) -1.4420(18) -1.0617(17) 0.073 Uiso 1 calc R . 
C32 C -0.1919(28) -1.4814(19) -1.1736(20) 0.069(9) Uani 1 d G . 
H32A H -0.2455(28) -1.5258(19) -1.1703(20) 0.083 Uiso 1 calc R . 
C33 C -0.1368(23) -1.4658(16) -1.2440(16) 0.053(7) Uani 1 d G . 
H33A H -0.1523(23) -1.4987(16) -1.2878(16) 0.063 Uiso 1 calc R . 
C34 C -0.0565(18) -1.3967(16) -1.2443(13) 0.042(6) Uani 1 d G . 
H34A H -0.0176(18) -1.3854(16) -1.2896(13) 0.051 Uiso 1 calc R . 
C35 C 0.0470(26) -1.2725(23) -1.1890(23) 0.085(11) Uani 1 d . . 
H35A H 0.0766(26) -1.2714(23) -1.2403(23) 0.128 Uiso 1 calc R . 
H35B H 0.1077(26) -1.2801(23) -1.1531(23) 0.128 Uiso 1 calc R . 
H35C H 0.0089(26) -1.2182(23) -1.1785(23) 0.128 Uiso 1 calc R . 
  
loop_ 
 _atom_site_aniso_label 
 _atom_site_aniso_U_11 
 _atom_site_aniso_U_22 
 _atom_site_aniso_U_33 
 _atom_site_aniso_U_23 
 _atom_site_aniso_U_13 
 _atom_site_aniso_U_12 
Eu1 0.0251(5) 0.0460(6) 0.0187(4) -0.0020(5) 0.0004(4) 0.0047(5) 
Eu2 0.0243(4) 0.0327(5) 0.0181(4) -0.0004(4) 0.0000(4) 0.0026(5) 
C1 0.024(11) 0.040(13) 0.040(12) -0.006(10) 0.000(10) 0.013(10) 
C2 0.045(13) 0.033(12) 0.019(9) 0.009(8) 0.001(9) -0.001(10) 
C3 0.041(14) 0.026(11) 0.047(13) -0.007(10) -0.010(12) 0.016(10) 
C4 0.043(13) 0.041(11) 0.017(9) 0.005(9) -0.011(10) -0.011(10) 
C5 0.018(9) 0.029(10) 0.032(11) 0.000(9) -0.001(9) 0.001(8) 
C6 0.038(15) 0.065(18) 0.059(17) 0.006(15) -0.008(13) 0.000(13) 
C7 0.067(20) 0.081(19) 0.040(13) -0.022(13) 0.000(14) 0.024(17) 
C8 0.088(24) 0.046(16) 0.085(23) -0.016(15) -0.003(19) 0.040(17) 
C9 0.067(19) 0.071(17) 0.032(12) 0.026(12) -0.003(13) -0.013(16) 
C10 0.044(15) 0.041(13) 0.058(16) -0.021(12) -0.025(13) 0.023(12) 
C11 0.031(11) 0.037(11) 0.013(9) 0.003(8) -0.004(9) -0.007(9) 
C12 0.041(13) 0.027(10) 0.017(9) -0.007(8) -0.001(9) 0.011(10) 
C13 0.024(10) 0.030(11) 0.022(10) -0.001(8) 0.001(8) -0.004(9) 
C14 0.029(10) 0.032(10) 0.027(9) 0.006(8) -0.001(8) 0.007(10) 
C15 0.032(11) 0.032(11) 0.018(9) 0.013(8) 0.007(9) 0.003(10) 
C16 0.012(9) 0.049(14) 0.041(13) -0.003(11) 0.002(9) -0.002(9) 
C17 0.056(17) 0.047(12) 0.021(12) -0.006(9) 0.011(11) 0.012(12) 
C18 0.050(15) 0.045(13) 0.042(13) -0.005(11) 0.006(13) -0.009(12) 
C19 0.054(13) 0.041(12) 0.021(9) 0.010(10) -0.015(9) 0.002(12) 
C20 0.021(11) 0.052(14) 0.027(11) 0.012(10) 0.003(9) 0.000(10) 
C21 0.037(14) 0.041(13) 0.030(12) -0.008(11) -0.007(10) 0.012(11) 
C22 0.036(12) 0.026(10) 0.040(12) -0.006(9) 0.003(11) 0.000(10) 
C23 0.052(15) 0.033(11) 0.027(12) -0.008(10) -0.008(11) -0.013(10) 
C24 0.022(9) 0.058(13) 0.014(8) -0.009(9) -0.002(7) 0.014(11) 
C25 0.038(12) 0.031(11) 0.024(10) -0.008(9) 0.006(10) 0.012(10) 
C26 0.044(15) 0.025(10) 0.034(11) 0.009(8) 0.001(11) 0.009(10) 
C27 0.027(12) 0.038(12) 0.029(11) -0.019(10) -0.010(9) -0.017(10) 
C28 0.033(11) 0.054(15) 0.030(10) 0.007(11) -0.001(9) 0.005(13) 
C29 0.025(10) 0.044(13) 0.038(12) 0.015(10) 0.002(9) 0.004(9) 
C30 0.048(13) 0.054(14) 0.025(10) 0.000(11) -0.009(9) 0.014(14) 
C31 0.053(18) 0.068(18) 0.063(18) 0.032(15) 0.018(16) -0.006(16) 
C32 0.060(19) 0.050(16) 0.097(25) 0.016(16) 0.001(19) 0.007(16) 
C33 0.050(16) 0.047(14) 0.061(16) -0.011(13) -0.013(14) -0.007(13) 
C34 0.030(11) 0.062(16) 0.035(11) -0.002(11) 0.007(9) 0.019(12) 
C35 0.046(17) 0.095(25) 0.115(30) 0.004(24) -0.011(21) -0.017(18) 
  
_geom_special_details 
; 
 All esds (except the esd in the dihedral angle between two l.s. planes) 
 are estimated using the full covariance matrix.  The cell esds are taken 
 into account individually in the estimation of esds in distances, angles 
 and torsion angles; correlations between esds in cell parameters are only 
 used when they are defined by crystal symmetry.  An approximate (isotropic) 
 treatment of cell esds is used for estimating esds involving l.s. planes. 
; 
  
loop_ 
 _geom_bond_atom_site_label_1 
 _geom_bond_atom_site_label_2 
 _geom_bond_distance 
 _geom_bond_site_symmetry_2 
 _geom_bond_publ_flag 
Eu1 C3 2.73(2) . ? 
Eu1 C4 2.76(2) . ? 
Eu1 C27 2.76(2) . ? 
Eu1 C2 2.78(2) . ? 
Eu1 C28 2.79(2) . ? 
Eu1 C21 2.80(2) . ? 
Eu1 C1 2.80(2) . ? 
Eu1 C5 2.81(2) . ? 
Eu1 C26 2.82(2) . ? 
Eu1 C23 2.82(2) . ? 
Eu1 C24 2.84(2) . ? 
Eu1 C22 2.85(2) . ? 
Eu2 C14 2.80(2) . ? 
Eu2 C12 2.80(2) . ? 
Eu2 C21 2.80(2) . ? 
Eu2 C28 2.81(2) . ? 
Eu2 C13 2.81(2) . ? 
Eu2 C11 2.81(2) . ? 
Eu2 C27 2.81(2) . ? 
Eu2 C15 2.82(2) . ? 
Eu2 C26 2.82(2) . ? 
Eu2 C22 2.83(2) . ? 
Eu2 C24 2.88(2) . ? 
Eu2 C25 2.89(2) . ? 
C1 C2 1.38(3) . ? 
C1 C5 1.44(3) . ? 
C1 C6 1.52(3) . ? 
C2 C3 1.42(3) . ? 
C2 C7 1.53(3) . ? 
C3 C4 1.41(3) . ? 
C3 C8 1.56(3) . ? 
C4 C5 1.41(3) . ? 
C4 C9 1.54(3) . ? 
C5 C10 1.50(3) . ? 
C11 C12 1.41(3) . ? 
C11 C15 1.44(3) . ? 
C11 C16 1.54(3) . ? 
C12 C13 1.42(3) . ? 
C12 C17 1.50(3) . ? 
C13 C14 1.44(3) . ? 
C13 C18 1.50(3) . ? 
C14 C15 1.42(3) . ? 
C14 C19 1.54(3) . ? 
C15 C20 1.50(3) . ? 
C21 C28 1.41(4) . ? 
C21 C22 1.41(3) . ? 
C22 C23 1.41(3) . ? 
C23 C24 1.44(3) . ? 
C24 C25 1.40(3) . ? 
C25 C26 1.40(3) . ? 
C26 C27 1.42(3) . ? 
C27 C28 1.40(3) . ? 
C29 C30 1.39 . ? 
C29 C34 1.37(3) . ? 
C29 C35 1.47(4) . ? 
C30 C31 1.34(3) . ? 
C31 C32 1.41(4) . ? 
C32 C33 1.41(4) . ? 
C33 C34 1.42(3) . ? 
  
loop_ 
 _geom_angle_atom_site_label_1 
 _geom_angle_atom_site_label_2 
 _geom_angle_atom_site_label_3 
 _geom_angle 
 _geom_angle_site_symmetry_1 
 _geom_angle_site_symmetry_3 
 _geom_angle_publ_flag 
C3 Eu1 C4 29.7(7) . . ? 
C3 Eu1 C27 121.0(7) . . ? 
C4 Eu1 C27 143.2(7) . . ? 
C3 Eu1 C2 29.8(7) . . ? 
C4 Eu1 C2 48.6(6) . . ? 
C27 Eu1 C2 95.4(6) . . ? 
C3 Eu1 C28 99.9(7) . . ? 
C4 Eu1 C28 128.8(7) . . ? 
C27 Eu1 C28 29.3(7) . . ? 
C2 Eu1 C28 82.9(6) . . ? 
C3 Eu1 C21 92.5(7) . . ? 
C4 Eu1 C21 120.8(7) . . ? 
C27 Eu1 C21 55.3(7) . . ? 
C2 Eu1 C21 89.4(6) . . ? 
C28 Eu1 C21 29.2(7) . . ? 
C3 Eu1 C1 48.4(7) . . ? 
C4 Eu1 C1 48.5(7) . . ? 
C27 Eu1 C1 96.9(7) . . ? 
C2 Eu1 C1 28.6(6) . . ? 
C28 Eu1 C1 97.8(6) . . ? 
C21 Eu1 C1 113.8(7) . . ? 
C3 Eu1 C5 48.7(6) . . ? 
C4 Eu1 C5 29.3(5) . . ? 
C27 Eu1 C5 123.7(6) . . ? 
C2 Eu1 C5 48.2(6) . . ? 
C28 Eu1 C5 127.1(6) . . ? 
C21 Eu1 C5 137.2(6) . . ? 
C1 Eu1 C5 29.6(6) . . ? 
C3 Eu1 C26 149.1(7) . . ? 
C4 Eu1 C26 157.1(6) . . ? 
C27 Eu1 C26 29.4(7) . . ? 
C2 Eu1 C26 120.5(6) . . ? 
C28 Eu1 C26 55.6(6) . . ? 
C21 Eu1 C26 74.3(7) . . ? 
C1 Eu1 C26 111.2(7) . . ? 
C5 Eu1 C26 127.8(6) . . ? 
C3 Eu1 C23 121.3(7) . . ? 
C4 Eu1 C23 128.1(7) . . ? 
C27 Eu1 C23 82.4(7) . . ? 
C2 Eu1 C23 138.5(6) . . ? 
C28 Eu1 C23 75.2(7) . . ? 
C21 Eu1 C23 55.3(7) . . ? 
C1 Eu1 C23 167.0(6) . . ? 
C5 Eu1 C23 153.9(7) . . ? 
C26 Eu1 C23 74.2(7) . . ? 
C3 Eu1 C24 149.5(7) . . ? 
C4 Eu1 C24 142.8(6) . . ? 
C27 Eu1 C24 74.0(6) . . ? 
C2 Eu1 C24 163.5(5) . . ? 
C28 Eu1 C24 81.9(6) . . ? 
C21 Eu1 C24 74.2(6) . . ? 
C1 Eu1 C24 162.0(6) . . ? 
C5 Eu1 C24 148.3(5) . . ? 
C26 Eu1 C24 53.9(6) . . ? 
C23 Eu1 C24 29.4(6) . . ? 
C3 Eu1 C22 101.1(6) . . ? 
C4 Eu1 C22 120.9(6) . . ? 
C27 Eu1 C22 74.4(6) . . ? 
C2 Eu1 C22 110.6(6) . . ? 
C28 Eu1 C22 55.4(7) . . ? 
C21 Eu1 C22 29.0(7) . . ? 
C1 Eu1 C22 138.6(6) . . ? 
C5 Eu1 C22 149.0(6) . . ? 
C26 Eu1 C22 81.0(6) . . ? 
C23 Eu1 C22 28.9(7) . . ? 
C24 Eu1 C22 54.9(6) . . ? 
C14 Eu2 C12 48.2(6) . . ? 
C14 Eu2 C21 134.9(6) . . ? 
C12 Eu2 C21 88.8(7) . . ? 
C14 Eu2 C28 131.3(6) . . ? 
C12 Eu2 C28 84.8(6) . . ? 
C21 Eu2 C28 29.1(7) . . ? 
C14 Eu2 C13 29.8(6) . . ? 
C12 Eu2 C13 29.4(6) . . ? 
C21 Eu2 C13 105.9(6) . . ? 
C28 Eu2 C13 111.4(6) . . ? 
C14 Eu2 C11 47.9(6) . . ? 
C12 Eu2 C11 29.0(6) . . ? 
C21 Eu2 C11 102.6(7) . . ? 
C28 Eu2 C11 85.6(6) . . ? 
C13 Eu2 C11 48.4(6) . . ? 
C14 Eu2 C27 133.1(7) . . ? 
C12 Eu2 C27 99.4(7) . . ? 
C21 Eu2 C27 54.7(7) . . ? 
C28 Eu2 C27 28.9(7) . . ? 
C13 Eu2 C27 128.8(6) . . ? 
C11 Eu2 C27 86.8(6) . . ? 
C14 Eu2 C15 29.2(6) . . ? 
C12 Eu2 C15 48.8(6) . . ? 
C21 Eu2 C15 132.2(7) . . ? 
C28 Eu2 C15 112.9(6) . . ? 
C13 Eu2 C15 49.3(6) . . ? 
C11 Eu2 C15 29.6(6) . . ? 
C27 Eu2 C15 105.1(7) . . ? 
C14 Eu2 C26 137.2(6) . . ? 
C12 Eu2 C26 124.6(7) . . ? 
C21 Eu2 C26 74.3(6) . . ? 
C28 Eu2 C26 55.5(6) . . ? 
C13 Eu2 C26 151.9(6) . . ? 
C11 Eu2 C26 103.7(6) . . ? 
C27 Eu2 C26 29.1(6) . . ? 
C15 Eu2 C26 109.3(6) . . ? 
C14 Eu2 C22 140.5(6) . . ? 
C12 Eu2 C22 108.1(6) . . ? 
C21 Eu2 C22 29.1(7) . . ? 
C28 Eu2 C22 55.4(7) . . ? 
C13 Eu2 C22 112.8(6) . . ? 
C11 Eu2 C22 129.2(6) . . ? 
C27 Eu2 C22 73.8(7) . . ? 
C15 Eu2 C22 156.9(6) . . ? 
C26 Eu2 C22 81.4(5) . . ? 
C14 Eu2 C24 147.7(5) . . ? 
C12 Eu2 C24 162.1(6) . . ? 
C21 Eu2 C24 73.4(6) . . ? 
C28 Eu2 C24 80.8(6) . . ? 
C13 Eu2 C24 154.4(6) . . ? 
C11 Eu2 C24 157.1(6) . . ? 
C27 Eu2 C24 72.5(6) . . ? 
C15 Eu2 C24 148.1(6) . . ? 
C26 Eu2 C24 53.4(6) . . ? 
C22 Eu2 C24 54.6(6) . . ? 
C14 Eu2 C25 143.1(6) . . ? 
C12 Eu2 C25 152.9(7) . . ? 
C21 Eu2 C25 81.2(7) . . ? 
C28 Eu2 C25 74.2(6) . . ? 
C13 Eu2 C25 172.9(6) . . ? 
C11 Eu2 C25 129.8(6) . . ? 
C27 Eu2 C25 54.4(7) . . ? 
C15 Eu2 C25 125.0(6) . . ? 
C26 Eu2 C25 28.3(7) . . ? 
C22 Eu2 C25 73.9(6) . . ? 
C24 Eu2 C25 28.1(6) . . ? 
C2 C1 C5 108.6(20) . . ? 
C2 C1 C6 127.4(20) . . ? 
C5 C1 C6 123.9(20) . . ? 
C2 C1 Eu1 74.8(13) . . ? 
C5 C1 Eu1 75.5(13) . . ? 
C6 C1 Eu1 118.8(16) . . ? 
C1 C2 C3 108.5(19) . . ? 
C1 C2 C7 125.6(21) . . ? 
C3 C2 C7 125.8(21) . . ? 
C1 C2 Eu1 76.6(13) . . ? 
C3 C2 Eu1 73.2(13) . . ? 
C7 C2 Eu1 117.8(14) . . ? 
C4 C3 C2 107.7(18) . . ? 
C4 C3 C8 123.7(24) . . ? 
C2 C3 C8 128.6(24) . . ? 
C4 C3 Eu1 76.1(12) . . ? 
C2 C3 Eu1 77.0(13) . . ? 
C8 C3 Eu1 115.3(17) . . ? 
C3 C4 C5 108.5(21) . . ? 
C3 C4 C9 125.8(21) . . ? 
C5 C4 C9 125.7(23) . . ? 
C3 C4 Eu1 74.3(13) . . ? 
C5 C4 Eu1 77.5(14) . . ? 
C9 C4 Eu1 116.2(15) . . ? 
C4 C5 C1 106.7(20) . . ? 
C4 C5 C10 127.7(23) . . ? 
C1 C5 C10 125.1(20) . . ? 
C4 C5 Eu1 73.1(14) . . ? 
C1 C5 Eu1 74.9(13) . . ? 
C10 C5 Eu1 124.1(14) . . ? 
C12 C11 C15 109.2(20) . . ? 
C12 C11 C16 125.0(21) . . ? 
C15 C11 C16 125.8(18) . . ? 
C12 C11 Eu2 75.0(13) . . ? 
C15 C11 Eu2 75.3(12) . . ? 
C16 C11 Eu2 118.1(13) . . ? 
C11 C12 C13 109.1(20) . . ? 
C11 C12 C17 126.7(23) . . ? 
C13 C12 C17 124.2(20) . . ? 
C11 C12 Eu2 75.9(13) . . ? 
C13 C12 Eu2 75.7(12) . . ? 
C17 C12 Eu2 117.6(14) . . ? 
C12 C13 C14 105.8(17) . . ? 
C12 C13 C18 128.0(20) . . ? 
C14 C13 C18 126.0(20) . . ? 
C12 C13 Eu2 74.9(11) . . ? 
C14 C13 Eu2 74.5(11) . . ? 
C18 C13 Eu2 119.6(14) . . ? 
C15 C14 C13 110.3(16) . . ? 
C15 C14 C19 124.6(18) . . ? 
C13 C14 C19 124.6(19) . . ? 
C15 C14 Eu2 76.2(11) . . ? 
C13 C14 Eu2 75.7(11) . . ? 
C19 C14 Eu2 121.7(13) . . ? 
C14 C15 C11 105.7(17) . . ? 
C14 C15 C20 128.1(20) . . ? 
C11 C15 C20 125.8(20) . . ? 
C14 C15 Eu2 74.6(11) . . ? 
C11 C15 Eu2 75.0(11) . . ? 
C20 C15 Eu2 121.2(14) . . ? 
C28 C21 C22 136.2(21) . . ? 
C28 C21 Eu1 75.1(13) . . ? 
C22 C21 Eu1 77.4(14) . . ? 
C28 C21 Eu2 75.6(13) . . ? 
C22 C21 Eu2 76.4(14) . . ? 
Eu1 C21 Eu2 100.1(7) . . ? 
C23 C22 C21 134.7(20) . . ? 
C23 C22 Eu2 79.1(14) . . ? 
C21 C22 Eu2 74.5(14) . . ? 
C23 C22 Eu1 74.6(12) . . ? 
C21 C22 Eu1 73.6(14) . . ? 
Eu2 C22 Eu1 98.3(6) . . ? 
C22 C23 C24 133.5(22) . . ? 
C22 C23 Eu1 76.5(13) . . ? 
C24 C23 Eu1 76.0(11) . . ? 
C22 C23 Eu2 72.4(14) . . ? 
C24 C23 Eu2 74.5(12) . . ? 
Eu1 C23 Eu2 96.9(7) . . ? 
C25 C24 C23 136.8(19) . . ? 
C25 C24 Eu1 76.2(12) . . ? 
C23 C24 Eu1 74.6(12) . . ? 
C25 C24 Eu2 76.1(11) . . ? 
C23 C24 Eu2 76.8(12) . . ? 
Eu1 C24 Eu2 97.2(6) . . ? 
C26 C25 C24 132.9(19) . . ? 
C26 C25 Eu1 74.5(12) . . ? 
C24 C25 Eu1 75.3(11) . . ? 
C26 C25 Eu2 73.0(12) . . ? 
C24 C25 Eu2 75.7(11) . . ? 
Eu1 C25 Eu2 96.8(6) . . ? 
C25 C26 C27 135.9(20) . . ? 
C25 C26 Eu2 78.7(13) . . ? 
C27 C26 Eu2 75.3(12) . . ? 
C25 C26 Eu1 77.0(13) . . ? 
C27 C26 Eu1 72.8(13) . . ? 
Eu2 C26 Eu1 99.2(6) . . ? 
C28 C27 C26 136.5(22) . . ? 
C28 C27 Eu1 76.7(14) . . ? 
C26 C27 Eu1 77.8(13) . . ? 
C28 C27 Eu2 75.4(12) . . ? 
C26 C27 Eu2 75.6(13) . . ? 
Eu1 C27 Eu2 100.8(7) . . ? 
C27 C28 C21 133.0(20) . . ? 
C27 C28 Eu1 74.0(14) . . ? 
C21 C28 Eu1 75.7(13) . . ? 
C27 C28 Eu2 75.7(12) . . ? 
C21 C28 Eu2 75.3(13) . . ? 
Eu1 C28 Eu2 100.1(7) . . ? 
C30 C29 C34 116.6(21) . . ? 
C30 C29 C35 124.0(25) . . ? 
C34 C29 C35 119.3(22) . . ? 
C31 C30 C29 123.7(23) . . ? 
C30 C31 C32 119.2(25) . . ? 
C33 C32 C31 120.8(28) . . ? 
C34 C33 C32 116.0(24) . . ? 
C33 C34 C29 123.7(21) . . ? 
  
_refine_diff_density_max    2.226 
_refine_diff_density_min   -1.527 
_refine_diff_density_rms    0.269 
  
#===end  
  
  
 
data_maj5 
  
_audit_creation_method            SHELXTL 
_chemical_name_systematic 
; 
 ? 
; 
_chemical_name_common             ? 
_chemical_formula_moiety          ? 
_chemical_formula_structural      ? 
_chemical_formula_analytical      ? 
_chemical_formula_sum             'C28 H38 Yb2' 
_chemical_formula_weight          720.66 
_chemical_melting_point           ? 
_chemical_compound_source         ? 
  
loop_ 
 _atom_type_symbol 
 _atom_type_description 
 _atom_type_scat_dispersion_real 
 _atom_type_scat_dispersion_imag 
 _atom_type_scat_source 
 'C'  'C'   0.0033   0.0016 
 'International Tables Vol C Tables 4.2.6.8 and 6.1.1.4' 
 'H'  'H'   0.0000   0.0000 
 'International Tables Vol C Tables 4.2.6.8 and 6.1.1.4' 
 'Yb'  'Yb'  -0.3850   5.5486 
 'International Tables Vol C Tables 4.2.6.8 and 6.1.1.4' 
  
_symmetry_cell_setting            Triclinic 
_symmetry_space_group_name_H-M    P-1 
  
loop_ 
 _symmetry_equiv_pos_as_xyz 
 'x, y, z' 
 '-x, -y, -z' 
  
_cell_length_a                    13.338(2) 
_cell_length_b                    13.549(2) 
_cell_length_c                    15.815(2) 
_cell_angle_alpha                 114.772(7) 
_cell_angle_beta                  93.948(11) 
_cell_angle_gamma                 90.803(14) 
_cell_volume                      2585.9(7) 
_cell_formula_units_Z             4 
_cell_measurement_temperature     163 
_cell_measurement_reflns_used     27 
_cell_measurement_theta_min       4.96 
_cell_measurement_theta_max       11.85 
  
_exptl_crystal_description        Plate 
_exptl_crystal_colour             Green 
_exptl_crystal_size_max           0.46 
_exptl_crystal_size_mid           0.43 
_exptl_crystal_size_min           0.10 
_exptl_crystal_density_meas       none 
_exptl_crystal_density_diffrn     1.851 
_exptl_crystal_density_method     none 
_exptl_crystal_F_000              1384 
_exptl_absorpt_coefficient_mu     7.200 
_exptl_absorpt_correction_type    empirical 
_exptl_absorpt_correction_T_min   0.1352 
_exptl_absorpt_correction_T_max   0.9696 
  
_exptl_special_details 
; 
 ? 
; 
  
_diffrn_ambient_temperature       163 
_diffrn_radiation_wavelength      0.71073 
_diffrn_radiation_type            MoK\a 
_diffrn_radiation_source          'sealed tube' 
_diffrn_radiation_monochromator   graphite 
_diffrn_measurement_device        'Siemens P4' 
_diffrn_measurement_method        '2\q/\w scans' 
_diffrn_standards_number          2 
_diffrn_standards_interval_count  98 
_diffrn_standards_interval_time   ? 
_diffrn_standards_decay_%         '< 1.0' 
_diffrn_reflns_number             11704 
_diffrn_reflns_av_R_equivalents   0.0178 
_diffrn_reflns_av_sigmaI/netI     0.0362 
_diffrn_reflns_limit_h_min        0 
_diffrn_reflns_limit_h_max        17 
_diffrn_reflns_limit_k_min        -15 
_diffrn_reflns_limit_k_max        15 
_diffrn_reflns_limit_l_min        -20 
_diffrn_reflns_limit_l_max        20 
_diffrn_reflns_theta_min          2.00 
_diffrn_reflns_theta_max          27.50 
_reflns_number_total              11224 
_reflns_number_observed           8750 
_reflns_observed_criterion        >2sigma(I) 
  
_computing_data_collection        'Siemens XSCANS' 
_computing_cell_refinement        'Siemens XSCANS' 
_computing_data_reduction         CARESS 
_computing_structure_solution     'Siemens SHELXTL' 
_computing_structure_refinement   'Siemens SHELXTL' 
_computing_molecular_graphics     'Siemens SHELXTL' 
_computing_publication_material   'Siemens SHELXTL' 
  
_refine_special_details 
; 
 Refinement on F^2^ for ALL reflections except for 0 with very negative F^2^ 
 or flagged by the user for potential systematic errors.  Weighted R-factors 
 wR and all goodnesses of fit S are based on F^2^, conventional R-factors R 
 are based on F, with F set to zero for negative F^2^. The observed criterion 
 of F^2^ > 2sigma(F^2^) is used only for calculating _R_factor_obs etc. and is 
 not relevant to the choice of reflections for refinement.  R-factors based 
 on F^2^ are statistically about twice as large as those based on F, and R- 
 factors based on ALL data will be even larger. 
; 
  
_refine_ls_structure_factor_coef  Fsqd 
_refine_ls_matrix_type            full 
_refine_ls_weighting_scheme 
 'calc w=1/[\s^2^(Fo^2^)+(0.1342P)^2^+2.1362P] where P=(Fo^2^+2Fc^2^)/3' 
_atom_sites_solution_primary      direct 
_atom_sites_solution_secondary    difmap 
_atom_sites_solution_hydrogens    geom 
_refine_ls_hydrogen_treatment     constr 
_refine_ls_extinction_method      SHELXTL 
_refine_ls_extinction_coef        0.0006(2) 
_refine_ls_extinction_expression 
 'Fc^*^=kFc[1+0.001xFc^2^\l^3^/sin(2\q)]^-1/4^' 
_refine_ls_number_reflns          11224 
_refine_ls_number_parameters      542 
_refine_ls_number_restraints      0 
_refine_ls_R_factor_all           0.0798 
_refine_ls_R_factor_obs           0.0604 
_refine_ls_wR_factor_all          0.1777 
_refine_ls_wR_factor_obs          0.1607 
_refine_ls_goodness_of_fit_all    1.032 
_refine_ls_goodness_of_fit_obs    1.061 
_refine_ls_restrained_S_all       1.032 
_refine_ls_restrained_S_obs       1.061 
_refine_ls_shift/esd_max          0.001 
_refine_ls_shift/esd_mean         0.000 
  
loop_ 
 _atom_site_label 
 _atom_site_type_symbol 
 _atom_site_fract_x 
 _atom_site_fract_y 
 _atom_site_fract_z 
 _atom_site_U_iso_or_equiv 
 _atom_site_thermal_displace_type 
 _atom_site_occupancy 
 _atom_site_calc_flag 
 _atom_site_refinement_flags 
 _atom_site_disorder_group 
Yb1 Yb 0.52328(3) 0.59644(4) 0.76222(3) 0.02194(13) Uani 1 d . . 
Yb2 Yb 0.31120(3) 0.43710(3) 0.80971(3) 0.02088(13) Uani 1 d . . 
C1 C 0.5515(7) 0.7189(8) 0.6739(6) 0.021(2) Uani 1 d . . 
C2 C 0.5416(7) 0.7947(8) 0.7688(6) 0.020(2) Uani 1 d . . 
C3 C 0.6273(6) 0.7837(8) 0.8234(6) 0.021(2) Uani 1 d . . 
C4 C 0.6885(7) 0.7043(8) 0.7634(6) 0.019(2) Uani 1 d . . 
C5 C 0.6420(8) 0.6669(8) 0.6706(6) 0.023(2) Uani 1 d . . 
C6 C 0.4790(8) 0.7077(11) 0.5936(7) 0.036(3) Uani 1 d . . 
H6A H 0.4222(8) 0.7539(11) 0.6170(7) 0.055 Uiso 1 calc R . 
H6B H 0.4542(8) 0.6317(11) 0.5600(7) 0.055 Uiso 1 calc R . 
H6C H 0.5130(8) 0.7302(11) 0.5511(7) 0.055 Uiso 1 calc R . 
C7 C 0.4573(8) 0.8644(9) 0.8056(8) 0.030(2) Uani 1 d . . 
H7A H 0.4085(8) 0.8571(9) 0.7538(8) 0.045 Uiso 1 calc R . 
H7B H 0.4824(8) 0.9404(9) 0.8385(8) 0.045 Uiso 1 calc R . 
H7C H 0.4245(8) 0.8424(9) 0.8490(8) 0.045 Uiso 1 calc R . 
C8 C 0.6474(8) 0.8477(10) 0.9272(7) 0.032(2) Uani 1 d . . 
H8A H 0.5928(8) 0.8971(10) 0.9511(7) 0.049 Uiso 1 calc R . 
H8B H 0.7113(8) 0.8902(10) 0.9406(7) 0.049 Uiso 1 calc R . 
H8C H 0.6512(8) 0.7977(10) 0.9574(7) 0.049 Uiso 1 calc R . 
C9 C 0.7925(8) 0.6784(11) 0.7897(8) 0.035(3) Uani 1 d . . 
H9A H 0.8181(8) 0.6202(11) 0.7352(8) 0.053 Uiso 1 calc R . 
H9B H 0.7895(8) 0.6547(11) 0.8401(8) 0.053 Uiso 1 calc R . 
H9C H 0.8374(8) 0.7435(11) 0.8108(8) 0.053 Uiso 1 calc R . 
C10 C 0.6864(9) 0.5854(11) 0.5843(7) 0.039(3) Uani 1 d . . 
H10A H 0.7504(9) 0.5623(11) 0.6026(7) 0.058 Uiso 1 calc R . 
H10B H 0.6980(9) 0.6194(11) 0.5417(7) 0.058 Uiso 1 calc R . 
H10C H 0.6396(9) 0.5220(11) 0.5527(7) 0.058 Uiso 1 calc R . 
C11 C 0.2757(7) 0.2463(8) 0.8129(6) 0.022(2) Uani 1 d . . 
C12 C 0.2429(8) 0.2344(9) 0.7213(7) 0.025(2) Uani 1 d . . 
C13 C 0.1569(7) 0.2974(9) 0.7285(7) 0.025(2) Uani 1 d . . 
C14 C 0.1377(7) 0.3484(9) 0.8224(7) 0.025(2) Uani 1 d . . 
C15 C 0.2108(7) 0.3199(8) 0.8759(6) 0.022(2) Uani 1 d . . 
C16 C 0.3666(8) 0.1969(9) 0.8392(7) 0.030(2) Uani 1 d . . 
H16A H 0.3973(8) 0.1495(9) 0.7825(7) 0.046 Uiso 1 calc R . 
H16B H 0.3459(8) 0.1542(9) 0.8725(7) 0.046 Uiso 1 calc R . 
H16C H 0.4155(8) 0.2550(9) 0.8796(7) 0.046 Uiso 1 calc R . 
C17 C 0.2889(9) 0.1620(9) 0.6335(7) 0.032(2) Uani 1 d . . 
H17A H 0.3477(9) 0.1289(9) 0.6497(7) 0.047 Uiso 1 calc R . 
H17B H 0.3097(9) 0.2053(9) 0.6007(7) 0.047 Uiso 1 calc R . 
H17C H 0.2394(9) 0.1047(9) 0.5931(7) 0.047 Uiso 1 calc R . 
C18 C 0.0933(9) 0.2999(10) 0.6454(8) 0.039(3) Uani 1 d . . 
H18A H 0.1245(9) 0.2570(10) 0.5876(8) 0.059 Uiso 1 calc R . 
H18B H 0.0891(9) 0.3753(10) 0.6530(8) 0.059 Uiso 1 calc R . 
H18C H 0.0256(9) 0.2690(10) 0.6422(8) 0.059 Uiso 1 calc R . 
C19 C 0.0474(9) 0.4158(10) 0.8597(9) 0.042(3) Uani 1 d . . 
H19A H 0.0514(9) 0.4426(10) 0.9279(9) 0.062 Uiso 1 calc R . 
H19B H -0.0146(9) 0.3706(10) 0.8325(9) 0.062 Uiso 1 calc R . 
H19C H 0.0473(9) 0.4776(10) 0.8429(9) 0.062 Uiso 1 calc R . 
C20 C 0.2127(9) 0.3473(10) 0.9796(7) 0.036(3) Uani 1 d . . 
H20A H 0.2721(9) 0.3173(10) 0.9984(7) 0.054 Uiso 1 calc R . 
H20B H 0.1518(9) 0.3159(10) 0.9918(7) 0.054 Uiso 1 calc R . 
H20C H 0.2155(9) 0.4265(10) 1.0154(7) 0.054 Uiso 1 calc R . 
C21 C 0.4008(9) 0.4261(10) 0.6608(8) 0.039(3) Uani 1 d . . 
H21 H 0.3933(9) 0.3798(10) 0.5958(8) 0.047 Uiso 1 calc R . 
C22 C 0.3391(8) 0.5158(10) 0.6851(7) 0.030(2) Uani 1 d . . 
H22 H 0.2969(8) 0.5141(10) 0.6335(7) 0.037 Uiso 1 calc R . 
C23 C 0.3259(8) 0.6070(10) 0.7682(8) 0.032(2) Uani 1 d . . 
H23 H 0.2789(8) 0.6541(10) 0.7588(8) 0.038 Uiso 1 calc R . 
C24 C 0.3644(9) 0.6462(9) 0.8615(8) 0.034(3) Uani 1 d . . 
H24 H 0.3366(9) 0.7126(9) 0.9004(8) 0.041 Uiso 1 calc R . 
C25 C 0.4364(9) 0.6085(10) 0.9115(7) 0.034(3) Uani 1 d . . 
H25 H 0.4457(9) 0.6562(10) 0.9760(7) 0.041 Uiso 1 calc R . 
C26 C 0.4963(7) 0.5182(12) 0.8879(8) 0.037(3) Uani 1 d . . 
H26 H 0.5372(7) 0.5190(12) 0.9399(8) 0.045 Uiso 1 calc R . 
C27 C 0.5094(8) 0.4267(11) 0.8048(10) 0.037(3) Uani 1 d . . 
H27 H 0.5549(8) 0.3785(11) 0.8147(10) 0.044 Uiso 1 calc R . 
C28 C 0.4724(9) 0.3882(10) 0.7107(9) 0.041(3) Uani 1 d . . 
H28 H 0.5011(9) 0.3225(10) 0.6716(9) 0.049 Uiso 1 calc R . 
Yb3 Yb 0.82072(3) 1.09981(4) 0.72820(3) 0.02418(14) Uani 1 d . . 
Yb4 Yb 0.99665(3) 0.87533(4) 0.71878(3) 0.02386(13) Uani 1 d . . 
C29 C 0.6262(6) 1.1160(9) 0.7113(6) 0.022(2) Uani 1 d . . 
C30 C 0.6545(7) 1.1664(8) 0.8081(6) 0.021(2) Uani 1 d . . 
C31 C 0.7140(7) 1.2601(8) 0.8265(7) 0.022(2) Uani 1 d . . 
C32 C 0.7219(7) 1.2707(8) 0.7424(7) 0.024(2) Uani 1 d . . 
C33 C 0.6669(7) 1.1822(9) 0.6706(7) 0.027(2) Uani 1 d . . 
C34 C 0.5603(8) 1.0110(9) 0.6601(7) 0.031(2) Uani 1 d . . 
H34A H 0.5523(8) 0.9936(9) 0.5932(7) 0.047 Uiso 1 calc R . 
H34B H 0.4942(8) 1.0212(9) 0.6851(7) 0.047 Uiso 1 calc R . 
H34C H 0.5925(8) 0.9512(9) 0.6692(7) 0.047 Uiso 1 calc R . 
C35 C 0.6269(8) 1.1252(9) 0.8796(7) 0.028(2) Uani 1 d . . 
H35A H 0.5845(8) 1.0582(9) 0.8484(7) 0.042 Uiso 1 calc R . 
H35B H 0.5900(8) 1.1805(9) 0.9273(7) 0.042 Uiso 1 calc R . 
H35C H 0.6883(8) 1.1105(9) 0.9091(7) 0.042 Uiso 1 calc R . 
C36 C 0.7597(8) 1.3429(9) 0.9226(7) 0.028(2) Uani 1 d . . 
H36A H 0.7980(8) 1.4006(9) 0.9151(7) 0.043 Uiso 1 calc R . 
H36B H 0.8045(8) 1.3061(9) 0.9507(7) 0.043 Uiso 1 calc R . 
H36C H 0.7056(8) 1.3748(9) 0.9633(7) 0.043 Uiso 1 calc R . 
C37 C 0.7680(9) 1.3654(10) 0.7289(9) 0.040(3) Uani 1 d . . 
H37A H 0.8025(9) 1.4171(10) 0.7880(9) 0.060 Uiso 1 calc R . 
H37B H 0.7148(9) 1.4019(10) 0.7086(9) 0.060 Uiso 1 calc R . 
H37C H 0.8164(9) 1.3385(10) 0.6812(9) 0.060 Uiso 1 calc R . 
C38 C 0.6513(10) 1.1590(11) 0.5674(7) 0.040(3) Uani 1 d . . 
H38A H 0.6097(10) 1.0917(11) 0.5340(7) 0.061 Uiso 1 calc R . 
H38B H 0.7167(10) 1.1508(11) 0.5411(7) 0.061 Uiso 1 calc R . 
H38C H 0.6175(10) 1.2195(11) 0.5610(7) 0.061 Uiso 1 calc R . 
C39 C 1.1068(7) 0.7621(9) 0.7854(6) 0.025(2) Uani 1 d . . 
C40 C 1.1689(7) 0.8528(9) 0.7948(7) 0.027(2) Uani 1 d . . 
C41 C 1.1876(7) 0.8385(8) 0.7012(6) 0.021(2) Uani 1 d . . 
C42 C 1.1353(8) 0.7393(9) 0.6376(7) 0.028(2) Uani 1 d . . 
C43 C 1.0859(7) 0.6923(8) 0.6896(7) 0.022(2) Uani 1 d . . 
C44 C 1.0755(9) 0.7413(12) 0.8673(8) 0.041(3) Uani 1 d . . 
H44A H 1.0997(9) 0.8026(12) 0.9260(8) 0.062 Uiso 1 calc R . 
H44B H 1.1047(9) 0.6743(12) 0.8651(8) 0.062 Uiso 1 calc R . 
H44C H 1.0020(9) 0.7335(12) 0.8637(8) 0.062 Uiso 1 calc R . 
C45 C 1.2088(9) 0.9431(10) 0.8831(7) 0.039(3) Uani 1 d . . 
H45A H 1.2493(9) 0.9947(10) 0.8693(7) 0.059 Uiso 1 calc R . 
H45B H 1.2509(9) 0.9142(10) 0.9200(7) 0.059 Uiso 1 calc R . 
H45C H 1.1528(9) 0.9804(10) 0.9187(7) 0.059 Uiso 1 calc R . 
C46 C 1.2445(8) 0.9146(9) 0.6750(8) 0.029(2) Uani 1 d . . 
H46A H 1.2729(8) 0.9761(9) 0.7317(8) 0.044 Uiso 1 calc R . 
H46B H 1.1992(8) 0.9414(9) 0.6386(8) 0.044 Uiso 1 calc R . 
H46C H 1.2990(8) 0.8767(9) 0.6374(8) 0.044 Uiso 1 calc R . 
C47 C 1.1360(10) 0.6911(11) 0.5324(7) 0.042(3) Uani 1 d . . 
H47A H 1.1756(10) 0.7397(11) 0.5144(7) 0.063 Uiso 1 calc R . 
H47B H 1.0668(10) 0.6825(11) 0.5041(7) 0.063 Uiso 1 calc R . 
H47C H 1.1660(10) 0.6199(11) 0.5104(7) 0.063 Uiso 1 calc R . 
C48 C 1.0297(10) 0.5838(10) 0.6489(9) 0.045(3) Uani 1 d . . 
H48A H 1.0265(10) 0.5536(10) 0.5806(9) 0.068 Uiso 1 calc R . 
H48B H 0.9613(10) 0.5927(10) 0.6692(9) 0.068 Uiso 1 calc R . 
H48C H 1.0645(10) 0.5342(10) 0.6704(9) 0.068 Uiso 1 calc R . 
C49 C 0.8015(8) 0.8931(9) 0.7003(10) 0.040(3) Uani 1 d . . 
H49 H 0.7469(8) 0.8420(9) 0.6882(10) 0.048 Uiso 1 calc R . 
C50 C 0.8361(10) 0.8929(10) 0.6180(8) 0.047(3) Uani 1 d . . 
H50 H 0.7955(10) 0.8466(10) 0.5635(8) 0.057 Uiso 1 calc R . 
C51 C 0.9158(11) 0.9446(10) 0.5977(8) 0.043(3) Uani 1 d . . 
H51 H 0.9203(11) 0.9192(10) 0.5323(8) 0.051 Uiso 1 calc R . 
C52 C 0.9900(10) 1.0233(12) 0.6484(10) 0.048(4) Uani 1 d . . 
H52 H 1.0317(10) 1.0417(12) 0.6103(10) 0.058 Uiso 1 calc R . 
C53 C 1.0173(8) 1.0832(10) 0.7463(12) 0.047(4) Uani 1 d . . 
H53 H 1.0721(8) 1.1342(10) 0.7587(12) 0.057 Uiso 1 calc R . 
C54 C 0.9814(11) 1.0842(10) 0.8297(8) 0.047(3) Uani 1 d . . 
H54 H 1.0210(11) 1.1317(10) 0.8844(8) 0.057 Uiso 1 calc R . 
C55 C 0.9026(10) 1.0322(11) 0.8493(8) 0.041(3) Uani 1 d . . 
H55 H 0.8967(10) 1.0571(11) 0.9144(8) 0.050 Uiso 1 calc R . 
C56 C 0.8294(9) 0.9515(11) 0.7953(10) 0.044(3) Uani 1 d . . 
H56 H 0.7884(9) 0.9312(11) 0.8328(10) 0.052 Uiso 1 calc R . 
  
loop_ 
 _atom_site_aniso_label 
 _atom_site_aniso_U_11 
 _atom_site_aniso_U_22 
 _atom_site_aniso_U_33 
 _atom_site_aniso_U_23 
 _atom_site_aniso_U_13 
 _atom_site_aniso_U_12 
Yb1 0.0140(2) 0.0265(3) 0.0306(2) 0.0168(2) 0.00534(15) -0.0045(2) 
Yb2 0.0138(2) 0.0236(2) 0.0286(2) 0.0141(2) 0.00370(14) -0.0054(2) 
C1 0.022(5) 0.022(5) 0.023(4) 0.013(4) -0.005(3) -0.011(4) 
C2 0.012(4) 0.023(5) 0.028(4) 0.015(4) 0.001(3) -0.009(4) 
C3 0.009(4) 0.028(5) 0.030(5) 0.018(4) -0.003(3) -0.008(4) 
C4 0.014(4) 0.021(5) 0.027(4) 0.015(4) 0.001(3) -0.004(4) 
C5 0.028(5) 0.017(5) 0.023(4) 0.007(4) 0.006(4) -0.009(4) 
C6 0.032(6) 0.054(8) 0.031(5) 0.028(5) -0.014(4) -0.011(5) 
C7 0.020(5) 0.024(6) 0.050(6) 0.018(5) 0.008(4) 0.003(4) 
C8 0.024(5) 0.049(7) 0.028(5) 0.021(5) -0.001(4) 0.000(5) 
C9 0.016(5) 0.053(8) 0.048(6) 0.033(6) 0.002(4) 0.006(5) 
C10 0.039(7) 0.049(8) 0.028(5) 0.014(5) 0.010(4) -0.001(6) 
C11 0.019(5) 0.022(5) 0.030(5) 0.019(4) -0.006(3) -0.006(4) 
C12 0.024(5) 0.026(6) 0.029(5) 0.014(4) 0.003(4) 0.001(4) 
C13 0.020(5) 0.025(5) 0.034(5) 0.020(4) -0.009(4) -0.010(4) 
C14 0.015(5) 0.025(5) 0.038(5) 0.015(4) 0.007(4) 0.001(4) 
C15 0.022(5) 0.017(5) 0.029(5) 0.012(4) 0.002(4) -0.009(4) 
C16 0.026(5) 0.035(6) 0.034(5) 0.018(5) -0.005(4) -0.001(5) 
C17 0.045(7) 0.021(5) 0.029(5) 0.011(4) 0.000(4) 0.002(5) 
C18 0.043(7) 0.039(7) 0.040(6) 0.023(5) -0.013(5) -0.002(6) 
C19 0.032(6) 0.034(7) 0.057(7) 0.016(5) 0.015(5) 0.009(5) 
C20 0.037(6) 0.038(7) 0.031(5) 0.013(5) 0.005(4) -0.005(5) 
C21 0.040(7) 0.041(7) 0.028(5) 0.006(5) 0.009(4) -0.010(6) 
C22 0.022(5) 0.041(7) 0.033(5) 0.020(5) -0.004(4) -0.012(5) 
C23 0.014(5) 0.045(7) 0.048(6) 0.031(5) 0.008(4) -0.001(5) 
C24 0.033(6) 0.020(5) 0.043(6) 0.005(4) 0.022(5) 0.001(5) 
C25 0.036(6) 0.047(7) 0.017(4) 0.012(4) -0.003(4) -0.015(5) 
C26 0.009(5) 0.077(10) 0.042(6) 0.044(6) -0.007(4) -0.016(5) 
C27 0.010(5) 0.051(8) 0.078(9) 0.053(7) 0.015(5) 0.011(5) 
C28 0.038(7) 0.028(6) 0.060(7) 0.015(5) 0.032(6) 0.004(5) 
Yb3 0.0173(2) 0.0242(3) 0.0375(2) 0.0182(2) 0.0084(2) 0.0059(2) 
Yb4 0.0157(2) 0.0213(2) 0.0358(2) 0.0132(2) 0.0022(2) 0.0034(2) 
C29 0.004(4) 0.031(6) 0.027(4) 0.009(4) 0.003(3) 0.000(4) 
C30 0.016(4) 0.019(5) 0.029(5) 0.011(4) 0.006(3) 0.006(4) 
C31 0.016(5) 0.016(5) 0.034(5) 0.012(4) 0.006(4) 0.002(4) 
C32 0.022(5) 0.021(5) 0.035(5) 0.016(4) 0.011(4) 0.010(4) 
C33 0.018(5) 0.038(6) 0.026(5) 0.015(4) 0.002(4) 0.007(4) 
C34 0.022(5) 0.030(6) 0.029(5) 0.002(4) 0.000(4) -0.004(4) 
C35 0.028(5) 0.029(6) 0.030(5) 0.016(4) 0.003(4) -0.003(4) 
C36 0.024(5) 0.028(6) 0.031(5) 0.011(4) -0.002(4) -0.006(4) 
C37 0.036(7) 0.037(7) 0.057(7) 0.027(6) 0.017(5) 0.004(5) 
C38 0.050(8) 0.044(7) 0.030(5) 0.020(5) -0.001(5) 0.004(6) 
C39 0.022(5) 0.033(6) 0.024(4) 0.015(4) 0.004(4) 0.008(4) 
C40 0.017(5) 0.032(6) 0.033(5) 0.013(4) 0.001(4) 0.005(4) 
C41 0.008(4) 0.024(5) 0.030(5) 0.009(4) -0.003(3) -0.004(4) 
C42 0.020(5) 0.031(6) 0.031(5) 0.009(4) 0.004(4) 0.001(4) 
C43 0.012(4) 0.011(4) 0.039(5) 0.005(4) 0.003(3) 0.005(3) 
C44 0.024(6) 0.062(9) 0.051(7) 0.035(6) 0.010(5) 0.010(6) 
C45 0.033(6) 0.042(7) 0.028(5) 0.002(5) -0.001(4) -0.012(5) 
C46 0.022(5) 0.029(6) 0.044(6) 0.021(5) 0.006(4) 0.005(4) 
C47 0.043(7) 0.044(7) 0.031(5) 0.008(5) 0.009(5) 0.001(6) 
C48 0.045(8) 0.023(6) 0.064(8) 0.015(6) 0.006(6) -0.005(5) 
C49 0.011(5) 0.021(6) 0.087(9) 0.025(6) -0.012(5) -0.006(4) 
C50 0.054(8) 0.032(7) 0.040(6) 0.005(5) -0.030(6) 0.000(6) 
C51 0.066(9) 0.032(7) 0.032(5) 0.013(5) 0.012(5) 0.032(6) 
C52 0.043(8) 0.055(9) 0.076(9) 0.050(8) 0.038(7) 0.025(7) 
C53 0.007(5) 0.022(6) 0.118(13) 0.036(7) -0.001(6) -0.004(4) 
C54 0.056(8) 0.031(7) 0.037(6) 0.001(5) -0.023(6) 0.005(6) 
C55 0.049(8) 0.046(8) 0.031(5) 0.016(5) 0.013(5) 0.029(6) 
C56 0.038(7) 0.046(8) 0.081(9) 0.054(7) 0.036(7) 0.024(6) 
  
_geom_special_details 
; 
 All esds (except the esd in the dihedral angle between two l.s. planes) 
 are estimated using the full covariance matrix.  The cell esds are taken 
 into account individually in the estimation of esds in distances, angles 
 and torsion angles; correlations between esds in cell parameters are only 
 used when they are defined by crystal symmetry.  An approximate (isotropic) 
 treatment of cell esds is used for estimating esds involving l.s. planes. 
; 
  
loop_ 
 _geom_bond_atom_site_label_1 
 _geom_bond_atom_site_label_2 
 _geom_bond_distance 
 _geom_bond_site_symmetry_2 
 _geom_bond_publ_flag 
Yb1 C1 2.615(9) . yes 
Yb1 C4 2.621(9) . yes 
Yb1 C5 2.636(9) . yes 
Yb1 C3 2.638(9) . yes 
Yb1 C23 2.644(10) . yes 
Yb1 C25 2.646(10) . yes 
Yb1 C21 2.645(12) . yes 
Yb1 C24 2.650(10) . yes 
Yb1 C2 2.651(10) . yes 
Yb1 C28 2.652(12) . yes 
Yb1 C26 2.657(10) . yes 
Yb1 C27 2.661(11) . yes 
Yb1 C22 2.667(10) . yes 
Yb2 C12 2.620(11) . yes 
Yb2 C15 2.633(9) . yes 
Yb2 C13 2.637(9) . yes 
Yb2 C11 2.643(10) . yes 
Yb2 C22 2.648(10) . yes 
Yb2 C14 2.651(10) . yes 
Yb2 C27 2.654(10) . yes 
Yb2 C23 2.652(11) . yes 
Yb2 C21 2.664(11) . yes 
Yb2 C24 2.668(11) . yes 
Yb2 C28 2.673(11) . yes 
Yb2 C25 2.676(11) . yes 
Yb2 C26 2.683(10) . yes 
Yb1 Cnt1 1.909 . yes 
Yb1 Cnt2 2.338 . yes 
Yb2 Cnt1 1.926 . yes 
Yb2 Cnt3 2.346 . yes 
C1 C5 1.399(14) . yes 
C1 C2 1.437(13) . yes 
C1 C6 1.496(12) . yes 
C2 C3 1.432(12) . yes 
C2 C7 1.469(14) . yes 
C3 C4 1.414(14) . yes 
C3 C8 1.502(13) . yes 
C4 C5 1.428(13) . yes 
C4 C9 1.508(13) . yes 
C5 C10 1.517(14) . yes 
C11 C15 1.430(14) . yes 
C11 C12 1.425(12) . yes 
C11 C16 1.509(13) . yes 
C12 C13 1.421(14) . yes 
C12 C17 1.503(14) . yes 
C13 C14 1.394(14) . yes 
C13 C18 1.528(13) . yes 
C14 C15 1.410(14) . yes 
C14 C19 1.519(15) . yes 
C15 C20 1.521(13) . yes 
C21 C22 1.41(2) . yes 
C21 C28 1.43(2) . yes 
C22 C23 1.40(2) . yes 
C23 C24 1.40(2) . yes 
C24 C25 1.43(2) . yes 
C25 C26 1.40(2) . yes 
C26 C27 1.40(2) . yes 
C27 C28 1.40(2) . yes 
Yb3 C31 2.592(9) . yes 
Yb3 C30 2.610(9) . yes 
Yb3 C29 2.611(9) . yes 
Yb3 C32 2.616(10) . yes 
Yb3 C50 2.629(12) . yes 
Yb3 C55 2.628(12) . yes 
Yb3 C33 2.635(10) . yes 
Yb3 C56 2.638(11) . yes 
Yb3 C53 2.641(11) . yes 
Yb3 C49 2.652(12) . yes 
Yb3 C54 2.653(12) . yes 
Yb3 C51 2.662(11) . yes 
Yb3 C52 2.670(12) . yes 
Yb4 C40 2.601(10) . yes 
Yb4 C39 2.613(10) . yes 
Yb4 C41 2.613(9) . yes 
Yb4 C56 2.626(11) . yes 
Yb4 C49 2.625(10) . yes 
Yb4 C42 2.627(10) . yes 
Yb4 C51 2.637(11) . yes 
Yb4 C43 2.641(9) . yes 
Yb4 C54 2.652(12) . yes 
Yb4 C50 2.654(11) . yes 
Yb4 C55 2.666(11) . yes 
Yb4 C52 2.670(12) . yes 
Yb4 C53 2.671(12) . yes 
Yb3 Cnt4 1.911 . yes 
Yb3 Cnt5 2.321 . yes 
Yb4 Cnt4 1.916 . yes 
Yb4 Cnt6 2.321 . yes 
C29 C30 1.410(13) . yes 
C29 C33 1.426(15) . yes 
C29 C34 1.534(14) . yes 
C30 C31 1.399(14) . yes 
C30 C35 1.518(13) . yes 
C31 C32 1.406(13) . yes 
C31 C36 1.538(13) . yes 
C32 C33 1.409(15) . yes 
C32 C37 1.515(15) . yes 
C33 C38 1.524(13) . yes 
C39 C43 1.414(13) . yes 
C39 C40 1.42(2) . yes 
C39 C44 1.520(14) . yes 
C40 C41 1.451(14) . yes 
C40 C45 1.476(14) . yes 
C41 C42 1.431(14) . yes 
C41 C46 1.479(14) . yes 
C42 C43 1.421(14) . yes 
C42 C47 1.512(14) . yes 
C43 C48 1.499(15) . yes 
C49 C56 1.39(2) . yes 
C49 C50 1.41(2) . yes 
C50 C51 1.39(2) . yes 
C51 C52 1.38(2) . yes 
C52 C53 1.43(2) . yes 
C53 C54 1.43(2) . yes 
C54 C55 1.38(2) . yes 
C55 C56 1.40(2) . yes 
  
loop_ 
 _geom_angle_atom_site_label_1 
 _geom_angle_atom_site_label_2 
 _geom_angle_atom_site_label_3 
 _geom_angle 
 _geom_angle_site_symmetry_1 
 _geom_angle_site_symmetry_3 
 _geom_angle_publ_flag 
Cnt1 Yb1 Cnt2 161.2 . . yes 
Cnt1 Yb2 Cnt3 159.2 . . yes 
Cnt4 Yb3 Cnt5 159.5 . . yes 
Cnt4 Yb4 Cnt6 163.8 . . yes 
C1 Yb1 C4 52.0(3) . . no 
C1 Yb1 C5 30.9(3) . . no 
C4 Yb1 C5 31.5(3) . . no 
C1 Yb1 C3 51.9(3) . . no 
C4 Yb1 C3 31.2(3) . . no 
C5 Yb1 C3 51.5(3) . . no 
C1 Yb1 C23 98.9(3) . . no 
C4 Yb1 C23 144.1(3) . . no 
C5 Yb1 C23 128.7(3) . . no 
C3 Yb1 C23 116.4(3) . . no 
C1 Yb1 C25 138.1(4) . . no 
C4 Yb1 C25 125.8(3) . . no 
C5 Yb1 C25 154.7(3) . . no 
C3 Yb1 C25 103.2(3) . . no 
C23 Yb1 C25 59.1(3) . . no 
C1 Yb1 C21 111.2(3) . . no 
C4 Yb1 C21 144.6(3) . . no 
C5 Yb1 C21 116.7(3) . . no 
C3 Yb1 C21 162.8(3) . . no 
C23 Yb1 C21 58.6(4) . . no 
C25 Yb1 C21 88.2(3) . . no 
C1 Yb1 C24 113.5(3) . . no 
C4 Yb1 C24 134.1(3) . . no 
C5 Yb1 C24 142.9(3) . . no 
C3 Yb1 C24 103.2(3) . . no 
C23 Yb1 C24 30.6(4) . . no 
C25 Yb1 C24 31.4(4) . . no 
C21 Yb1 C24 79.8(3) . . no 
C1 Yb1 C2 31.7(3) . . no 
C4 Yb1 C2 52.0(3) . . no 
C5 Yb1 C2 51.6(3) . . no 
C3 Yb1 C2 31.4(3) . . no 
C23 Yb1 C2 92.0(3) . . no 
C25 Yb1 C2 108.7(3) . . no 
C21 Yb1 C2 132.6(3) . . no 
C24 Yb1 C2 92.2(3) . . no 
C1 Yb1 C28 134.9(4) . . no 
C4 Yb1 C28 134.7(3) . . no 
C5 Yb1 C28 123.7(3) . . no 
C3 Yb1 C28 162.7(4) . . no 
C23 Yb1 C28 80.0(4) . . no 
C25 Yb1 C28 79.7(4) . . no 
C21 Yb1 C28 31.4(4) . . no 
C24 Yb1 C28 88.2(3) . . no 
C2 Yb1 C28 163.4(4) . . no 
C1 Yb1 C26 166.1(4) . . no 
C4 Yb1 C26 122.8(3) . . no 
C5 Yb1 C26 151.0(3) . . no 
C3 Yb1 C26 116.1(3) . . no 
C23 Yb1 C26 79.9(3) . . no 
C25 Yb1 C26 30.6(4) . . no 
C21 Yb1 C26 80.2(4) . . no 
C24 Yb1 C26 59.2(4) . . no 
C2 Yb1 C26 134.5(4) . . no 
C28 Yb1 C26 58.7(4) . . no 
C1 Yb1 C27 163.1(4) . . no 
C4 Yb1 C27 126.8(3) . . no 
C5 Yb1 C27 137.5(3) . . no 
C3 Yb1 C27 138.1(3) . . no 
C23 Yb1 C27 87.4(3) . . no 
C25 Yb1 C27 58.3(4) . . no 
C21 Yb1 C27 58.9(4) . . no 
C24 Yb1 C27 79.6(3) . . no 
C2 Yb1 C27 164.7(4) . . no 
C28 Yb1 C27 30.6(4) . . no 
C26 Yb1 C27 30.6(4) . . no 
C1 Yb1 C22 98.0(3) . . no 
C4 Yb1 C22 149.2(3) . . no 
C5 Yb1 C22 118.9(3) . . no 
C3 Yb1 C22 138.1(3) . . no 
C23 Yb1 C22 30.6(4) . . no 
C25 Yb1 C22 79.9(3) . . no 
C21 Yb1 C22 30.7(4) . . no 
C24 Yb1 C22 58.5(3) . . no 
C2 Yb1 C22 107.4(3) . . no 
C28 Yb1 C22 59.1(4) . . no 
C26 Yb1 C22 88.0(3) . . no 
C27 Yb1 C22 79.5(3) . . no 
C12 Yb2 C15 51.9(3) . . no 
C12 Yb2 C13 31.4(3) . . no 
C15 Yb2 C13 51.3(3) . . no 
C12 Yb2 C11 31.4(3) . . no 
C15 Yb2 C11 31.4(3) . . no 
C13 Yb2 C11 51.6(3) . . no 
C12 Yb2 C22 108.6(3) . . no 
C15 Yb2 C22 153.0(3) . . no 
C13 Yb2 C22 102.0(3) . . no 
C11 Yb2 C22 138.4(3) . . no 
C12 Yb2 C14 51.3(3) . . no 
C15 Yb2 C14 30.9(3) . . no 
C13 Yb2 C14 30.6(3) . . no 
C11 Yb2 C14 51.3(3) . . no 
C22 Yb2 C14 123.7(3) . . no 
C12 Yb2 C27 104.4(4) . . no 
C15 Yb2 C27 120.3(3) . . no 
C13 Yb2 C27 134.7(4) . . no 
C11 Yb2 C27 97.3(3) . . no 
C22 Yb2 C27 80.0(3) . . no 
C14 Yb2 C27 148.5(3) . . no 
C12 Yb2 C23 135.7(3) . . no 
C15 Yb2 C23 150.5(3) . . no 
C13 Yb2 C23 117.3(3) . . no 
C11 Yb2 C23 167.1(3) . . no 
C22 Yb2 C23 30.7(3) . . no 
C14 Yb2 C23 123.7(3) . . no 
C27 Yb2 C23 87.4(3) . . no 
C12 Yb2 C21 91.4(3) . . no 
C15 Yb2 C21 143.1(3) . . no 
C13 Yb2 C21 100.7(3) . . no 
C11 Yb2 C21 114.2(3) . . no 
C22 Yb2 C21 30.7(4) . . no 
C14 Yb2 C21 130.7(3) . . no 
C27 Yb2 C21 58.8(4) . . no 
C23 Yb2 C21 58.3(4) . . no 
C12 Yb2 C24 166.1(3) . . no 
C15 Yb2 C24 137.7(3) . . no 
C13 Yb2 C24 140.4(4) . . no 
C11 Yb2 C24 162.4(3) . . no 
C22 Yb2 C24 58.5(3) . . no 
C14 Yb2 C24 129.3(3) . . no 
C27 Yb2 C24 79.4(4) . . no 
C23 Yb2 C24 30.4(4) . . no 
C21 Yb2 C24 79.1(3) . . no 
C12 Yb2 C28 89.6(3) . . no 
C15 Yb2 C28 129.5(4) . . no 
C13 Yb2 C28 113.0(4) . . no 
C11 Yb2 C28 98.5(3) . . no 
C22 Yb2 C28 59.1(4) . . no 
C14 Yb2 C28 140.8(4) . . no 
C27 Yb2 C28 30.5(4) . . no 
C23 Yb2 C28 79.4(4) . . no 
C21 Yb2 C28 31.1(4) . . no 
C24 Yb2 C28 87.4(3) . . no 
C12 Yb2 C25 159.8(4) . . no 
C15 Yb2 C25 125.3(3) . . no 
C13 Yb2 C25 167.3(4) . . no 
C11 Yb2 C25 133.8(3) . . no 
C22 Yb2 C25 79.7(3) . . no 
C14 Yb2 C25 139.3(3) . . no 
C27 Yb2 C25 58.0(4) . . no 
C23 Yb2 C25 58.6(3) . . no 
C21 Yb2 C25 87.2(3) . . no 
C24 Yb2 C25 31.1(4) . . no 
C28 Yb2 C25 78.8(4) . . no 
C12 Yb2 C26 129.9(4) . . no 
C15 Yb2 C26 118.8(3) . . no 
C13 Yb2 C26 160.9(4) . . no 
C11 Yb2 C26 110.7(3) . . no 
C22 Yb2 C26 87.9(3) . . no 
C14 Yb2 C26 147.7(3) . . no 
C27 Yb2 C26 30.5(4) . . no 
C23 Yb2 C26 79.3(3) . . no 
C21 Yb2 C26 79.4(3) . . no 
C24 Yb2 C26 58.7(4) . . no 
C28 Yb2 C26 58.2(4) . . no 
C25 Yb2 C26 30.3(4) . . no 
C5 C1 C2 108.6(8) . . yes 
C5 C1 C6 127.6(9) . . yes 
C2 C1 C6 123.7(10) . . yes 
C5 C1 Yb1 75.4(5) . . no 
C2 C1 Yb1 75.5(5) . . no 
C6 C1 Yb1 119.3(7) . . no 
C3 C2 C1 106.6(9) . . yes 
C3 C2 C7 125.7(9) . . yes 
C1 C2 C7 127.6(9) . . yes 
C3 C2 Yb1 73.8(6) . . no 
C1 C2 Yb1 72.8(5) . . no 
C7 C2 Yb1 115.3(6) . . no 
C4 C3 C2 108.7(8) . . yes 
C4 C3 C8 126.6(8) . . yes 
C2 C3 C8 124.7(9) . . yes 
C4 C3 Yb1 73.7(5) . . no 
C2 C3 Yb1 74.8(5) . . no 
C8 C3 Yb1 118.0(6) . . no 
C3 C4 C5 107.5(8) . . yes 
C3 C4 C9 126.0(9) . . yes 
C5 C4 C9 125.7(9) . . yes 
C3 C4 Yb1 75.1(5) . . no 
C5 C4 Yb1 74.8(5) . . no 
C9 C4 Yb1 124.1(7) . . no 
C1 C5 C4 108.6(8) . . yes 
C1 C5 C10 127.0(9) . . yes 
C4 C5 C10 124.4(10) . . yes 
C1 C5 Yb1 73.7(5) . . no 
C4 C5 Yb1 73.7(5) . . no 
C10 C5 Yb1 119.4(7) . . no 
C15 C11 C12 107.3(8) . . yes 
C15 C11 C16 126.4(8) . . yes 
C12 C11 C16 126.2(9) . . yes 
C15 C11 Yb2 73.9(5) . . no 
C12 C11 Yb2 73.4(6) . . no 
C16 C11 Yb2 115.1(6) . . no 
C13 C12 C11 107.7(9) . . yes 
C13 C12 C17 127.3(9) . . yes 
C11 C12 C17 124.9(9) . . yes 
C13 C12 Yb2 75.0(6) . . no 
C11 C12 Yb2 75.2(6) . . no 
C17 C12 Yb2 118.6(7) . . no 
C14 C13 C12 108.3(8) . . yes 
C14 C13 C18 126.9(10) . . yes 
C12 C13 C18 124.6(10) . . yes 
C14 C13 Yb2 75.3(6) . . no 
C12 C13 Yb2 73.7(6) . . no 
C18 C13 Yb2 120.8(7) . . no 
C13 C14 C15 109.0(9) . . yes 
C13 C14 C19 125.4(10) . . yes 
C15 C14 C19 125.5(9) . . yes 
C13 C14 Yb2 74.1(5) . . no 
C15 C14 Yb2 73.8(5) . . no 
C19 C14 Yb2 122.2(7) . . no 
C14 C15 C11 107.7(8) . . yes 
C14 C15 C20 126.9(9) . . yes 
C11 C15 C20 124.9(9) . . yes 
C14 C15 Yb2 75.2(5) . . no 
C11 C15 Yb2 74.6(5) . . no 
C20 C15 Yb2 122.9(7) . . no 
C22 C21 C28 135.1(10) . . yes 
C22 C21 Yb1 75.5(6) . . no 
C28 C21 Yb1 74.6(7) . . no 
C22 C21 Yb2 74.0(6) . . no 
C28 C21 Yb2 74.8(6) . . no 
Yb1 C21 Yb2 92.5(3) . . no 
C21 C22 C23 134.3(10) . . yes 
C21 C22 Yb2 75.3(6) . . no 
C23 C22 Yb2 74.9(6) . . no 
C21 C22 Yb1 73.8(6) . . no 
C23 C22 Yb1 73.8(6) . . no 
Yb2 C22 Yb1 92.4(3) . . no 
C24 C23 C22 136.3(11) . . yes 
C24 C23 Yb1 74.9(6) . . no 
C22 C23 Yb1 75.6(6) . . no 
C24 C23 Yb2 75.4(7) . . no 
C22 C23 Yb2 74.5(7) . . no 
Yb1 C23 Yb2 92.8(4) . . no 
C23 C24 C25 134.2(10) . . yes 
C23 C24 Yb1 74.5(6) . . no 
C25 C24 Yb1 74.1(6) . . no 
C23 C24 Yb2 74.2(7) . . no 
C25 C24 Yb2 74.7(6) . . no 
Yb1 C24 Yb2 92.3(3) . . no 
C26 C25 C24 135.3(9) . . yes 
C26 C25 Yb1 75.1(6) . . no 
C24 C25 Yb1 74.4(6) . . no 
C26 C25 Yb2 75.1(6) . . no 
C24 C25 Yb2 74.1(6) . . no 
Yb1 C25 Yb2 92.2(3) . . no 
C25 C26 C27 134.3(9) . . yes 
C25 C26 Yb1 74.2(6) . . no 
C27 C26 Yb1 74.9(6) . . no 
C25 C26 Yb2 74.6(6) . . no 
C27 C26 Yb2 73.6(6) . . no 
Yb1 C26 Yb2 91.8(3) . . no 
C26 C27 C28 136.3(11) . . yes 
C26 C27 Yb2 75.9(6) . . no 
C28 C27 Yb2 75.5(7) . . no 
C26 C27 Yb1 74.6(7) . . no 
C28 C27 Yb1 74.3(7) . . no 
Yb2 C27 Yb1 92.4(3) . . no 
C27 C28 C21 134.1(11) . . yes 
C27 C28 Yb1 75.1(7) . . no 
C21 C28 Yb1 74.1(7) . . no 
C27 C28 Yb2 74.0(6) . . no 
C21 C28 Yb2 74.1(6) . . no 
Yb1 C28 Yb2 92.1(4) . . no 
C31 Yb3 C30 31.2(3) . . no 
C31 Yb3 C29 51.8(3) . . no 
C30 Yb3 C29 31.3(3) . . no 
C31 Yb3 C32 31.3(3) . . no 
C30 Yb3 C32 51.8(3) . . no 
C29 Yb3 C32 51.9(3) . . no 
C31 Yb3 C50 150.5(4) . . no 
C30 Yb3 C50 119.9(4) . . no 
C29 Yb3 C50 100.5(4) . . no 
C32 Yb3 C50 142.0(3) . . no 
C31 Yb3 C55 104.4(3) . . no 
C30 Yb3 C55 97.6(3) . . no 
C29 Yb3 C55 120.6(4) . . no 
C32 Yb3 C55 134.3(3) . . no 
C50 Yb3 C55 80.1(4) . . no 
C31 Yb3 C33 51.6(3) . . no 
C30 Yb3 C33 51.7(3) . . no 
C29 Yb3 C33 31.5(3) . . no 
C32 Yb3 C33 31.1(3) . . no 
C50 Yb3 C33 111.5(3) . . no 
C55 Yb3 C33 149.3(3) . . no 
C31 Yb3 C56 111.4(3) . . no 
C30 Yb3 C56 89.8(3) . . no 
C29 Yb3 C56 100.3(4) . . no 
C32 Yb3 C56 140.9(3) . . no 
C50 Yb3 C56 58.8(4) . . no 
C55 Yb3 C56 30.8(4) . . no 
C33 Yb3 C56 131.6(4) . . no 
C31 Yb3 C53 128.1(4) . . no 
C30 Yb3 C53 148.4(4) . . no 
C29 Yb3 C53 179.6(4) . . no 
C32 Yb3 C53 128.2(3) . . no 
C50 Yb3 C53 79.6(4) . . no 
C55 Yb3 C53 59.0(4) . . no 
C33 Yb3 C53 148.8(4) . . no 
C56 Yb3 C53 79.4(4) . . no 
C31 Yb3 C49 128.1(4) . . no 
C30 Yb3 C49 98.3(3) . . no 
C29 Yb3 C49 92.4(3) . . no 
C32 Yb3 C49 144.3(3) . . no 
C50 Yb3 C49 31.0(4) . . no 
C55 Yb3 C49 58.7(4) . . no 
C33 Yb3 C49 117.4(3) . . no 
C56 Yb3 C49 30.6(4) . . no 
C53 Yb3 C49 87.5(3) . . no 
C31 Yb3 C54 111.1(3) . . no 
C30 Yb3 C54 119.3(4) . . no 
C29 Yb3 C54 148.3(4) . . no 
C32 Yb3 C54 129.9(4) . . no 
C50 Yb3 C54 87.7(4) . . no 
C55 Yb3 C54 30.3(4) . . no 
C33 Yb3 C54 160.9(4) . . no 
C56 Yb3 C54 58.0(5) . . no 
C53 Yb3 C54 31.3(5) . . no 
C49 Yb3 C54 78.9(4) . . no 
C31 Yb3 C51 168.0(3) . . no 
C30 Yb3 C51 148.6(4) . . no 
C29 Yb3 C51 121.9(4) . . no 
C32 Yb3 C51 137.0(3) . . no 
C50 Yb3 C51 30.5(4) . . no 
C55 Yb3 C51 87.6(3) . . no 
C33 Yb3 C51 117.1(3) . . no 
C56 Yb3 C51 79.0(4) . . no 
C53 Yb3 C51 58.3(5) . . no 
C49 Yb3 C51 58.3(4) . . no 
C54 Yb3 C51 79.3(4) . . no 
C31 Yb3 C52 151.1(4) . . no 
C30 Yb3 C52 177.2(3) . . no 
C29 Yb3 C52 149.0(4) . . no 
C32 Yb3 C52 131.0(3) . . no 
C50 Yb3 C52 58.1(5) . . no 
C55 Yb3 C52 80.3(4) . . no 
C33 Yb3 C52 130.3(4) . . no 
C56 Yb3 C52 87.4(3) . . no 
C53 Yb3 C52 31.3(5) . . no 
C49 Yb3 C52 79.1(4) . . no 
C54 Yb3 C52 59.5(5) . . no 
C51 Yb3 C52 30.0(5) . . no 
C40 Yb4 C39 31.6(3) . . no 
C40 Yb4 C41 32.3(3) . . no 
C39 Yb4 C41 52.4(3) . . no 
C40 Yb4 C56 130.1(4) . . no 
C39 Yb4 C56 118.7(3) . . no 
C41 Yb4 C56 160.5(4) . . no 
C40 Yb4 C49 157.8(4) . . no 
C39 Yb4 C49 132.6(4) . . no 
C41 Yb4 C49 168.7(4) . . no 
C56 Yb4 C49 30.8(4) . . no 
C40 Yb4 C42 52.6(3) . . no 
C39 Yb4 C42 51.7(3) . . no 
C41 Yb4 C42 31.7(3) . . no 
C56 Yb4 C42 161.1(4) . . no 
C49 Yb4 C42 139.5(4) . . no 
C40 Yb4 C51 142.3(4) . . no 
C39 Yb4 C51 159.5(3) . . no 
C41 Yb4 C51 113.0(4) . . no 
C56 Yb4 C51 79.6(4) . . no 
C49 Yb4 C51 58.9(4) . . no 
C42 Yb4 C51 108.0(3) . . no 
C40 Yb4 C43 52.5(3) . . no 
C39 Yb4 C43 31.2(3) . . no 
C41 Yb4 C43 52.4(3) . . no 
C56 Yb4 C43 131.3(3) . . no 
C49 Yb4 C43 124.9(3) . . no 
C42 Yb4 C43 31.3(3) . . no 
C51 Yb4 C43 129.9(3) . . no 
C40 Yb4 C54 96.5(4) . . no 
C39 Yb4 C54 117.0(3) . . no 
C41 Yb4 C54 107.9(4) . . no 
C56 Yb4 C54 58.1(5) . . no 
C49 Yb4 C54 79.4(4) . . no 
C42 Yb4 C54 139.3(4) . . no 
C51 Yb4 C54 79.7(4) . . no 
C43 Yb4 C54 147.4(3) . . no 
C40 Yb4 C50 171.1(4) . . no 
C39 Yb4 C50 150.8(4) . . no 
C41 Yb4 C50 138.8(4) . . no 
C56 Yb4 C50 58.6(4) . . no 
C49 Yb4 C50 31.0(4) . . no 
C42 Yb4 C50 120.1(4) . . no 
C51 Yb4 C50 30.5(4) . . no 
C43 Yb4 C50 125.1(3) . . no 
C54 Yb4 C50 87.2(4) . . no 
C40 Yb4 C55 108.1(4) . . no 
C39 Yb4 C55 113.1(3) . . no 
C41 Yb4 C55 131.6(4) . . no 
C56 Yb4 C55 30.6(4) . . no 
C49 Yb4 C55 58.5(4) . . no 
C42 Yb4 C55 160.7(4) . . no 
C51 Yb4 C55 87.3(3) . . no 
C43 Yb4 C55 140.7(3) . . no 
C54 Yb4 C55 30.1(4) . . no 
C50 Yb4 C55 79.0(4) . . no 
C40 Yb4 C52 117.3(4) . . no 
C39 Yb4 C52 147.8(4) . . no 
C41 Yb4 C52 96.5(4) . . no 
C56 Yb4 C52 87.7(3) . . no 
C49 Yb4 C52 79.6(4) . . no 
C42 Yb4 C52 107.7(4) . . no 
C51 Yb4 C52 30.1(4) . . no 
C43 Yb4 C52 138.5(3) . . no 
C54 Yb4 C52 59.5(4) . . no 
C50 Yb4 C52 57.8(5) . . no 
C55 Yb4 C52 79.6(4) . . no 
C40 Yb4 C53 100.4(4) . . no 
C39 Yb4 C53 130.6(4) . . no 
C41 Yb4 C53 94.7(3) . . no 
C56 Yb4 C53 79.1(4) . . no 
C49 Yb4 C53 87.4(3) . . no 
C42 Yb4 C53 119.8(4) . . no 
C51 Yb4 C53 58.2(4) . . no 
C43 Yb4 C53 147.1(3) . . no 
C54 Yb4 C53 31.1(4) . . no 
C50 Yb4 C53 78.6(4) . . no 
C55 Yb4 C53 58.2(4) . . no 
C52 Yb4 C53 31.1(5) . . no 
C30 C29 C33 107.6(9) . . yes 
C30 C29 C34 125.9(9) . . yes 
C33 C29 C34 126.4(9) . . yes 
C30 C29 Yb3 74.3(5) . . no 
C33 C29 Yb3 75.2(5) . . no 
C34 C29 Yb3 118.2(7) . . no 
C31 C30 C29 108.0(9) . . yes 
C31 C30 C35 125.9(9) . . yes 
C29 C30 C35 126.1(9) . . yes 
C31 C30 Yb3 73.7(5) . . no 
C29 C30 Yb3 74.4(5) . . no 
C35 C30 Yb3 117.0(6) . . no 
C30 C31 C32 108.8(9) . . yes 
C30 C31 C36 126.7(9) . . yes 
C32 C31 C36 124.4(9) . . yes 
C30 C31 Yb3 75.1(5) . . no 
C32 C31 Yb3 75.2(5) . . no 
C36 C31 Yb3 118.6(6) . . no 
C33 C32 C31 107.8(9) . . yes 
C33 C32 C37 123.6(9) . . yes 
C31 C32 C37 128.1(10) . . yes 
C33 C32 Yb3 75.2(6) . . no 
C31 C32 Yb3 73.4(5) . . no 
C37 C32 Yb3 123.3(7) . . no 
C32 C33 C29 107.7(8) . . yes 
C32 C33 C38 127.5(10) . . yes 
C29 C33 C38 124.8(10) . . yes 
C32 C33 Yb3 73.7(6) . . no 
C29 C33 Yb3 73.3(5) . . no 
C38 C33 Yb3 119.1(7) . . no 
C43 C39 C40 109.6(9) . . yes 
C43 C39 C44 126.3(10) . . yes 
C40 C39 C44 124.0(9) . . yes 
C43 C39 Yb4 75.5(5) . . no 
C40 C39 Yb4 73.7(6) . . no 
C44 C39 Yb4 120.9(7) . . no 
C39 C40 C41 107.0(9) . . yes 
C39 C40 C45 126.6(10) . . yes 
C41 C40 C45 126.4(10) . . yes 
C39 C40 Yb4 74.7(6) . . no 
C41 C40 Yb4 74.3(5) . . no 
C45 C40 Yb4 117.8(8) . . no 
C42 C41 C40 107.0(9) . . yes 
C42 C41 C46 125.9(9) . . yes 
C40 C41 C46 127.0(9) . . yes 
C42 C41 Yb4 74.7(5) . . no 
C40 C41 Yb4 73.4(5) . . no 
C46 C41 Yb4 114.8(7) . . no 
C43 C42 C41 108.9(8) . . yes 
C43 C42 C47 125.9(10) . . yes 
C41 C42 C47 125.2(10) . . yes 
C43 C42 Yb4 74.9(5) . . no 
C41 C42 Yb4 73.6(6) . . no 
C47 C42 Yb4 119.4(8) . . no 
C39 C43 C42 107.5(9) . . yes 
C39 C43 C48 127.1(10) . . yes 
C42 C43 C48 125.2(10) . . yes 
C39 C43 Yb4 73.3(6) . . no 
C42 C43 Yb4 73.8(6) . . no 
C48 C43 Yb4 122.5(7) . . no 
C56 C49 C50 134.4(11) . . yes 
C56 C49 Yb4 74.6(6) . . no 
C50 C49 Yb4 75.7(7) . . no 
C56 C49 Yb3 74.2(7) . . no 
C50 C49 Yb3 73.6(7) . . no 
Yb4 C49 Yb3 93.0(3) . . no 
C51 C50 C49 135.0(10) . . yes 
C51 C50 Yb3 76.1(7) . . no 
C49 C50 Yb3 75.4(7) . . no 
C51 C50 Yb4 74.1(7) . . no 
C49 C50 Yb4 73.4(6) . . no 
Yb3 C50 Yb4 92.8(3) . . no 
C52 C51 C50 136.3(11) . . yes 
C52 C51 Yb4 76.2(7) . . no 
C50 C51 Yb4 75.4(7) . . no 
C52 C51 Yb3 75.3(7) . . no 
C50 C51 Yb3 73.4(7) . . no 
Yb4 C51 Yb3 92.5(3) . . no 
C51 C52 C53 133.5(11) . . yes 
C51 C52 Yb3 74.7(7) . . no 
C53 C52 Yb3 73.3(6) . . no 
C51 C52 Yb4 73.6(7) . . no 
C53 C52 Yb4 74.5(7) . . no 
Yb3 C52 Yb4 91.6(3) . . no 
C52 C53 C54 134.9(11) . . yes 
C52 C53 Yb3 75.4(7) . . no 
C54 C53 Yb3 74.8(7) . . no 
C52 C53 Yb4 74.4(7) . . no 
C54 C53 Yb4 73.7(7) . . no 
Yb3 C53 Yb4 92.2(3) . . no 
C55 C54 C53 134.9(11) . . yes 
C55 C54 Yb4 75.5(7) . . no 
C53 C54 Yb4 75.2(7) . . no 
C55 C54 Yb3 73.8(7) . . no 
C53 C54 Yb3 73.9(6) . . no 
Yb4 C54 Yb3 92.3(3) . . no 
C54 C55 C56 134.7(11) . . yes 
C54 C55 Yb3 75.9(7) . . no 
C56 C55 Yb3 75.0(7) . . no 
C54 C55 Yb4 74.4(7) . . no 
C56 C55 Yb4 73.1(7) . . no 
Yb3 C55 Yb4 92.6(3) . . no 
C49 C56 C55 136.0(11) . . yes 
C49 C56 Yb4 74.6(7) . . no 
C55 C56 Yb4 76.3(7) . . no 
C49 C56 Yb3 75.3(7) . . no 
C55 C56 Yb3 74.2(7) . . no 
Yb4 C56 Yb3 93.3(3) . . no 
  
_refine_diff_density_max    2.966 
_refine_diff_density_min   -4.280 
_refine_diff_density_rms    0.371 
  
